# Supplementary material for: Facile C–H iodination of electron deficient benzodithiophene-S,S-tetraoxide for the development of n-type polymers
Source: Royal Society of Chemistry journal article supplement (doi:10.1039/d0py01292k), 2020-01-01
Supplement: d0py01292k1.pdf [file d0py01292k1.pdf]

## Supplementary Information

# Facile C-H Iodination of Electron Deficient Benzodithiophene-*S,S*-Tetraoxide for the Development of N-Type Polymers

Santosh Adhikari,<sup>a</sup> Yi Xin Ren,<sup>b</sup> Mihaela C. Stefan,<sup>b</sup> and Toby L. Nelson<sup>a,\*</sup>

<sup>a</sup> Department of Chemistry, Oklahoma State University, Stillwater, Oklahoma, 74078, USA

<sup>b</sup> Department of Chemistry and Biochemistry, University of Texas at Dallas, Richardson, 75080

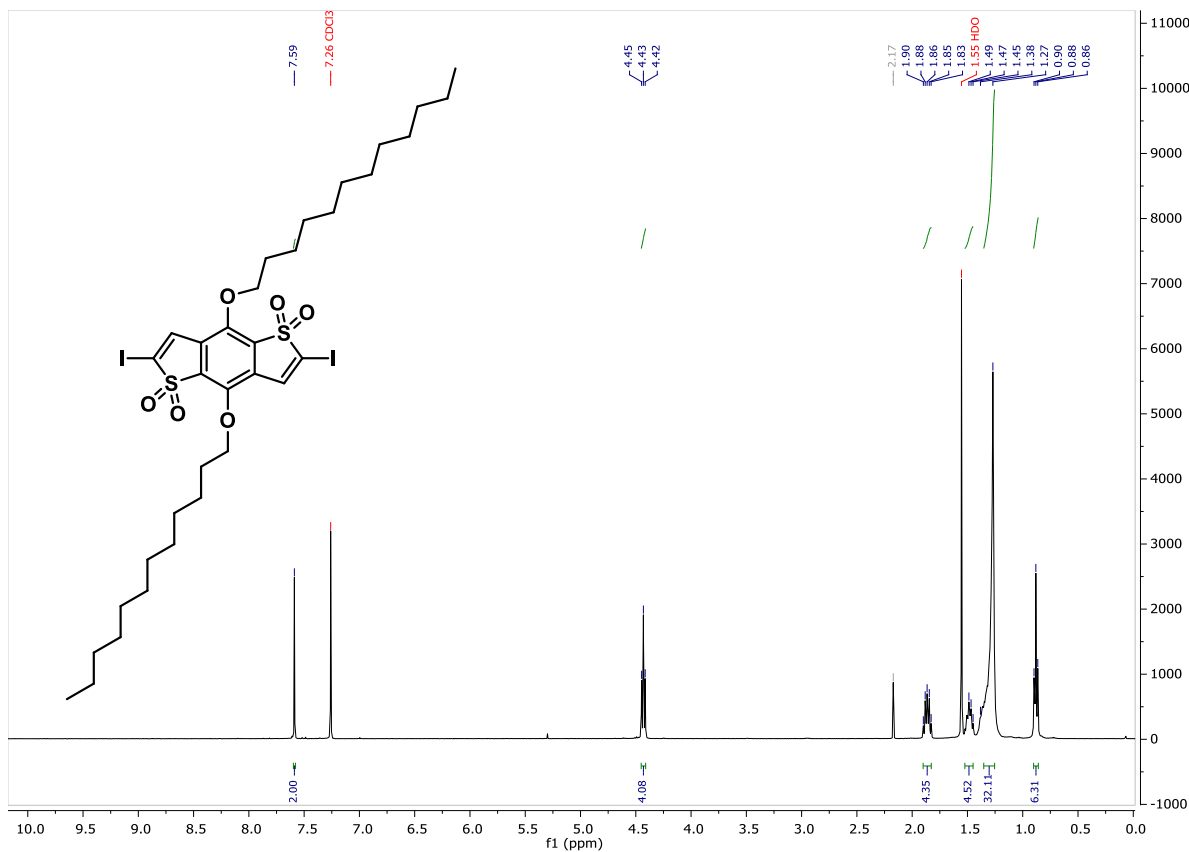

Figure S1: <sup>1</sup>H NMR of 2

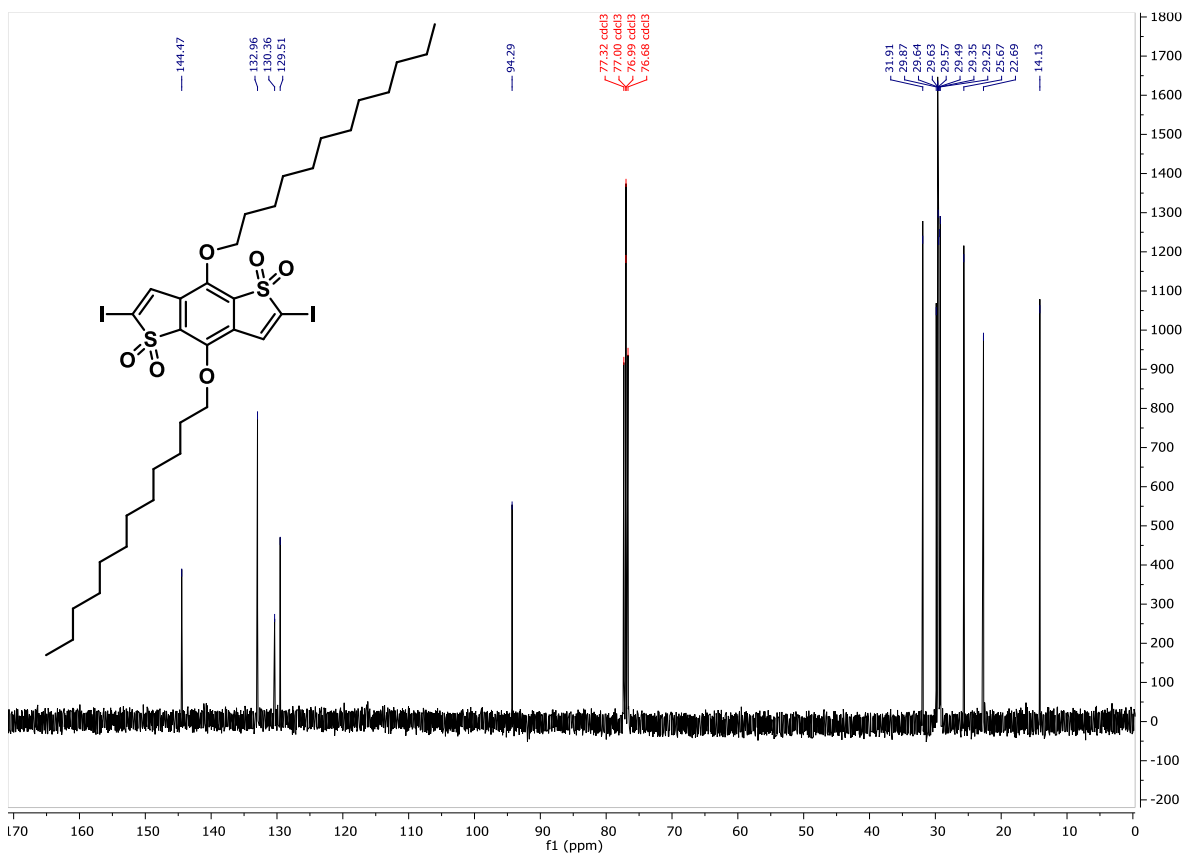

Figure S2: <sup>13</sup>C NMR of 2

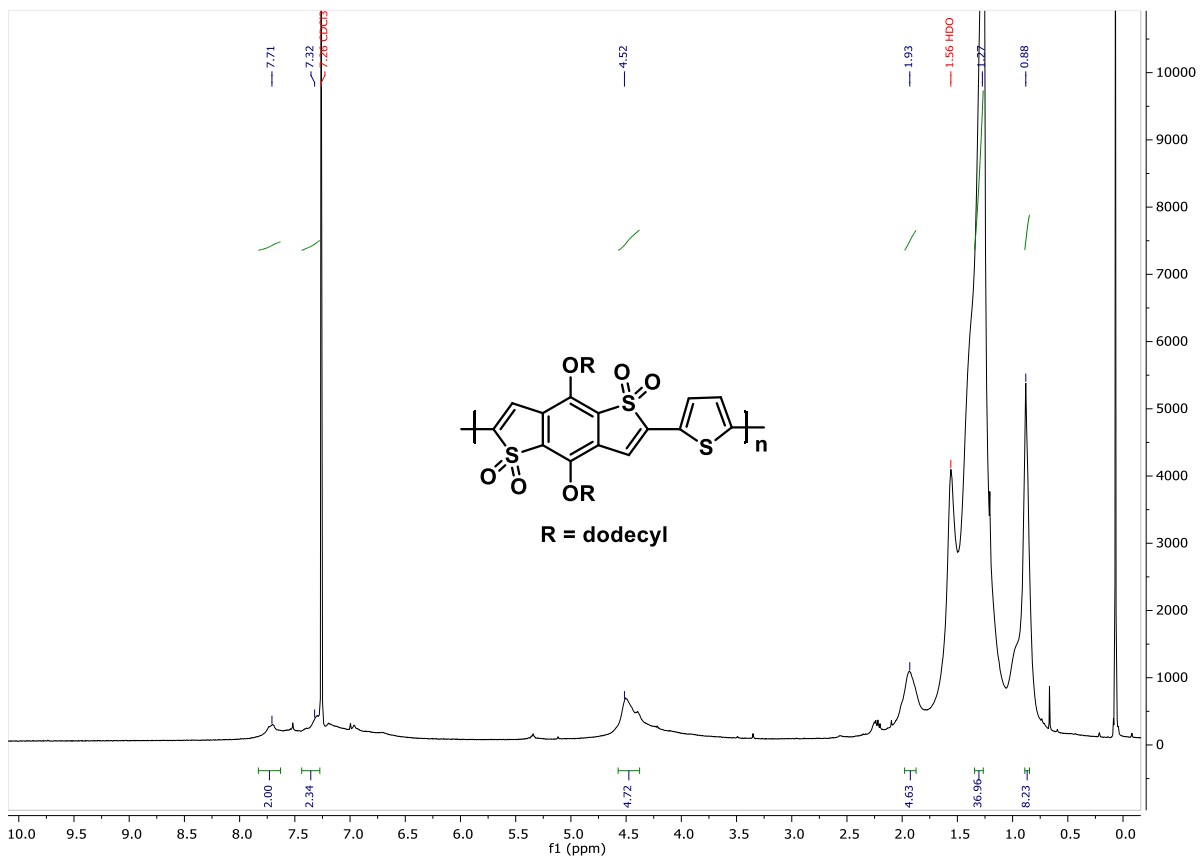

Figure S3: <sup>1</sup>H NMR of PBDTT-Th

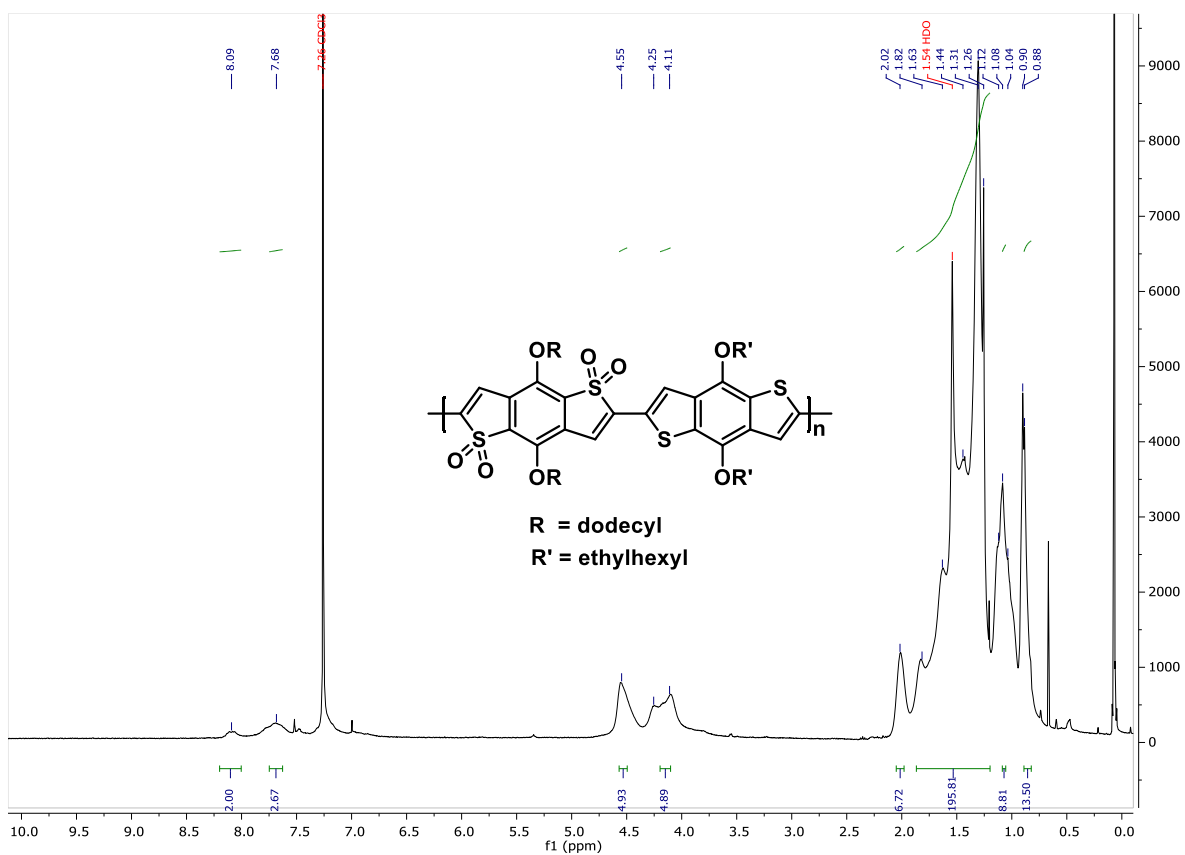

**Figure S4: <sup>1</sup>H NMR of PBDTT-BDT**

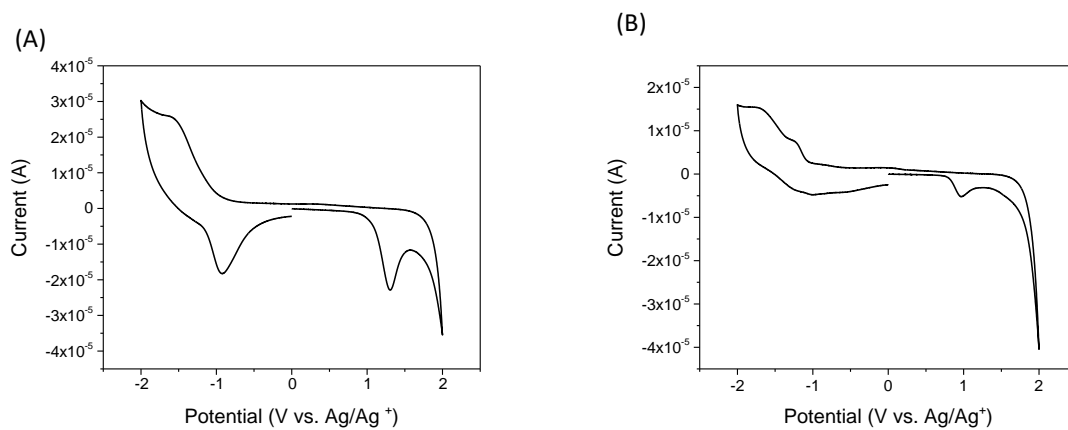

**Figure S5: CV spectra of (A) PBDTT-Th and (B) PBDTT-B**

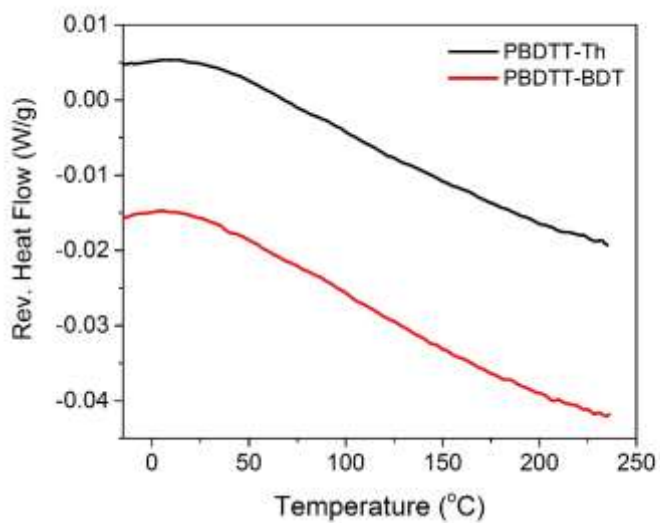

**Figure S6: DSC thermograms of PBDTT-Th and PBDTT-BDT.**
